# Supplementary material for: Endophytic bacteria diversity in different tissues of Polygala sibirica Linnaeus and Polygala crotalarioides Buchanan-Hamilton ex Candolle
Source: Research Square preprint supplement (doi:10.21203/rs.3.rs-4570649/v1), 2024-07-01

Supplementary

**Fig. 1S**  Species identification certificate of *P. sibirica* Linnaeus


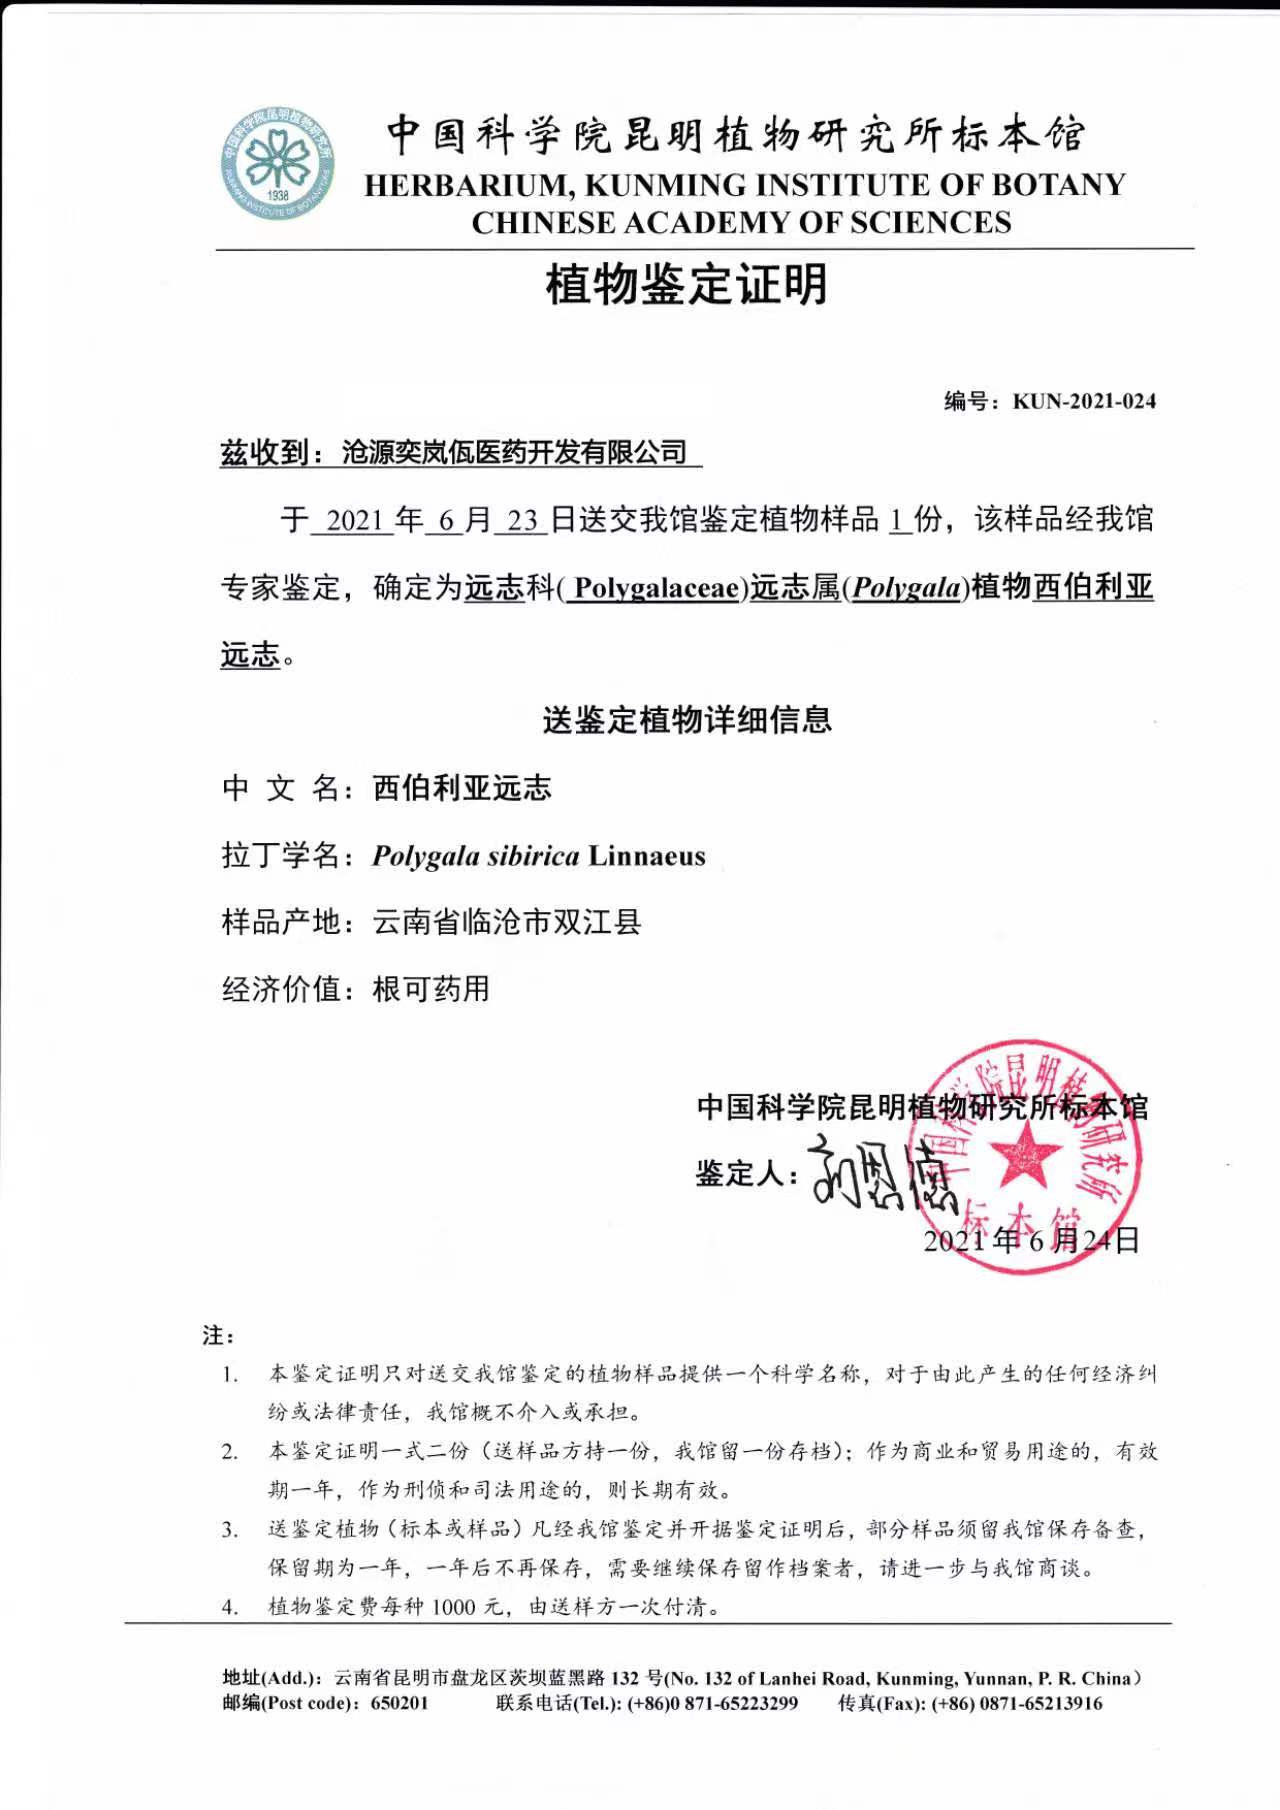


**Fig. 2S**  Species identification certificate of *P. crotalarioides*


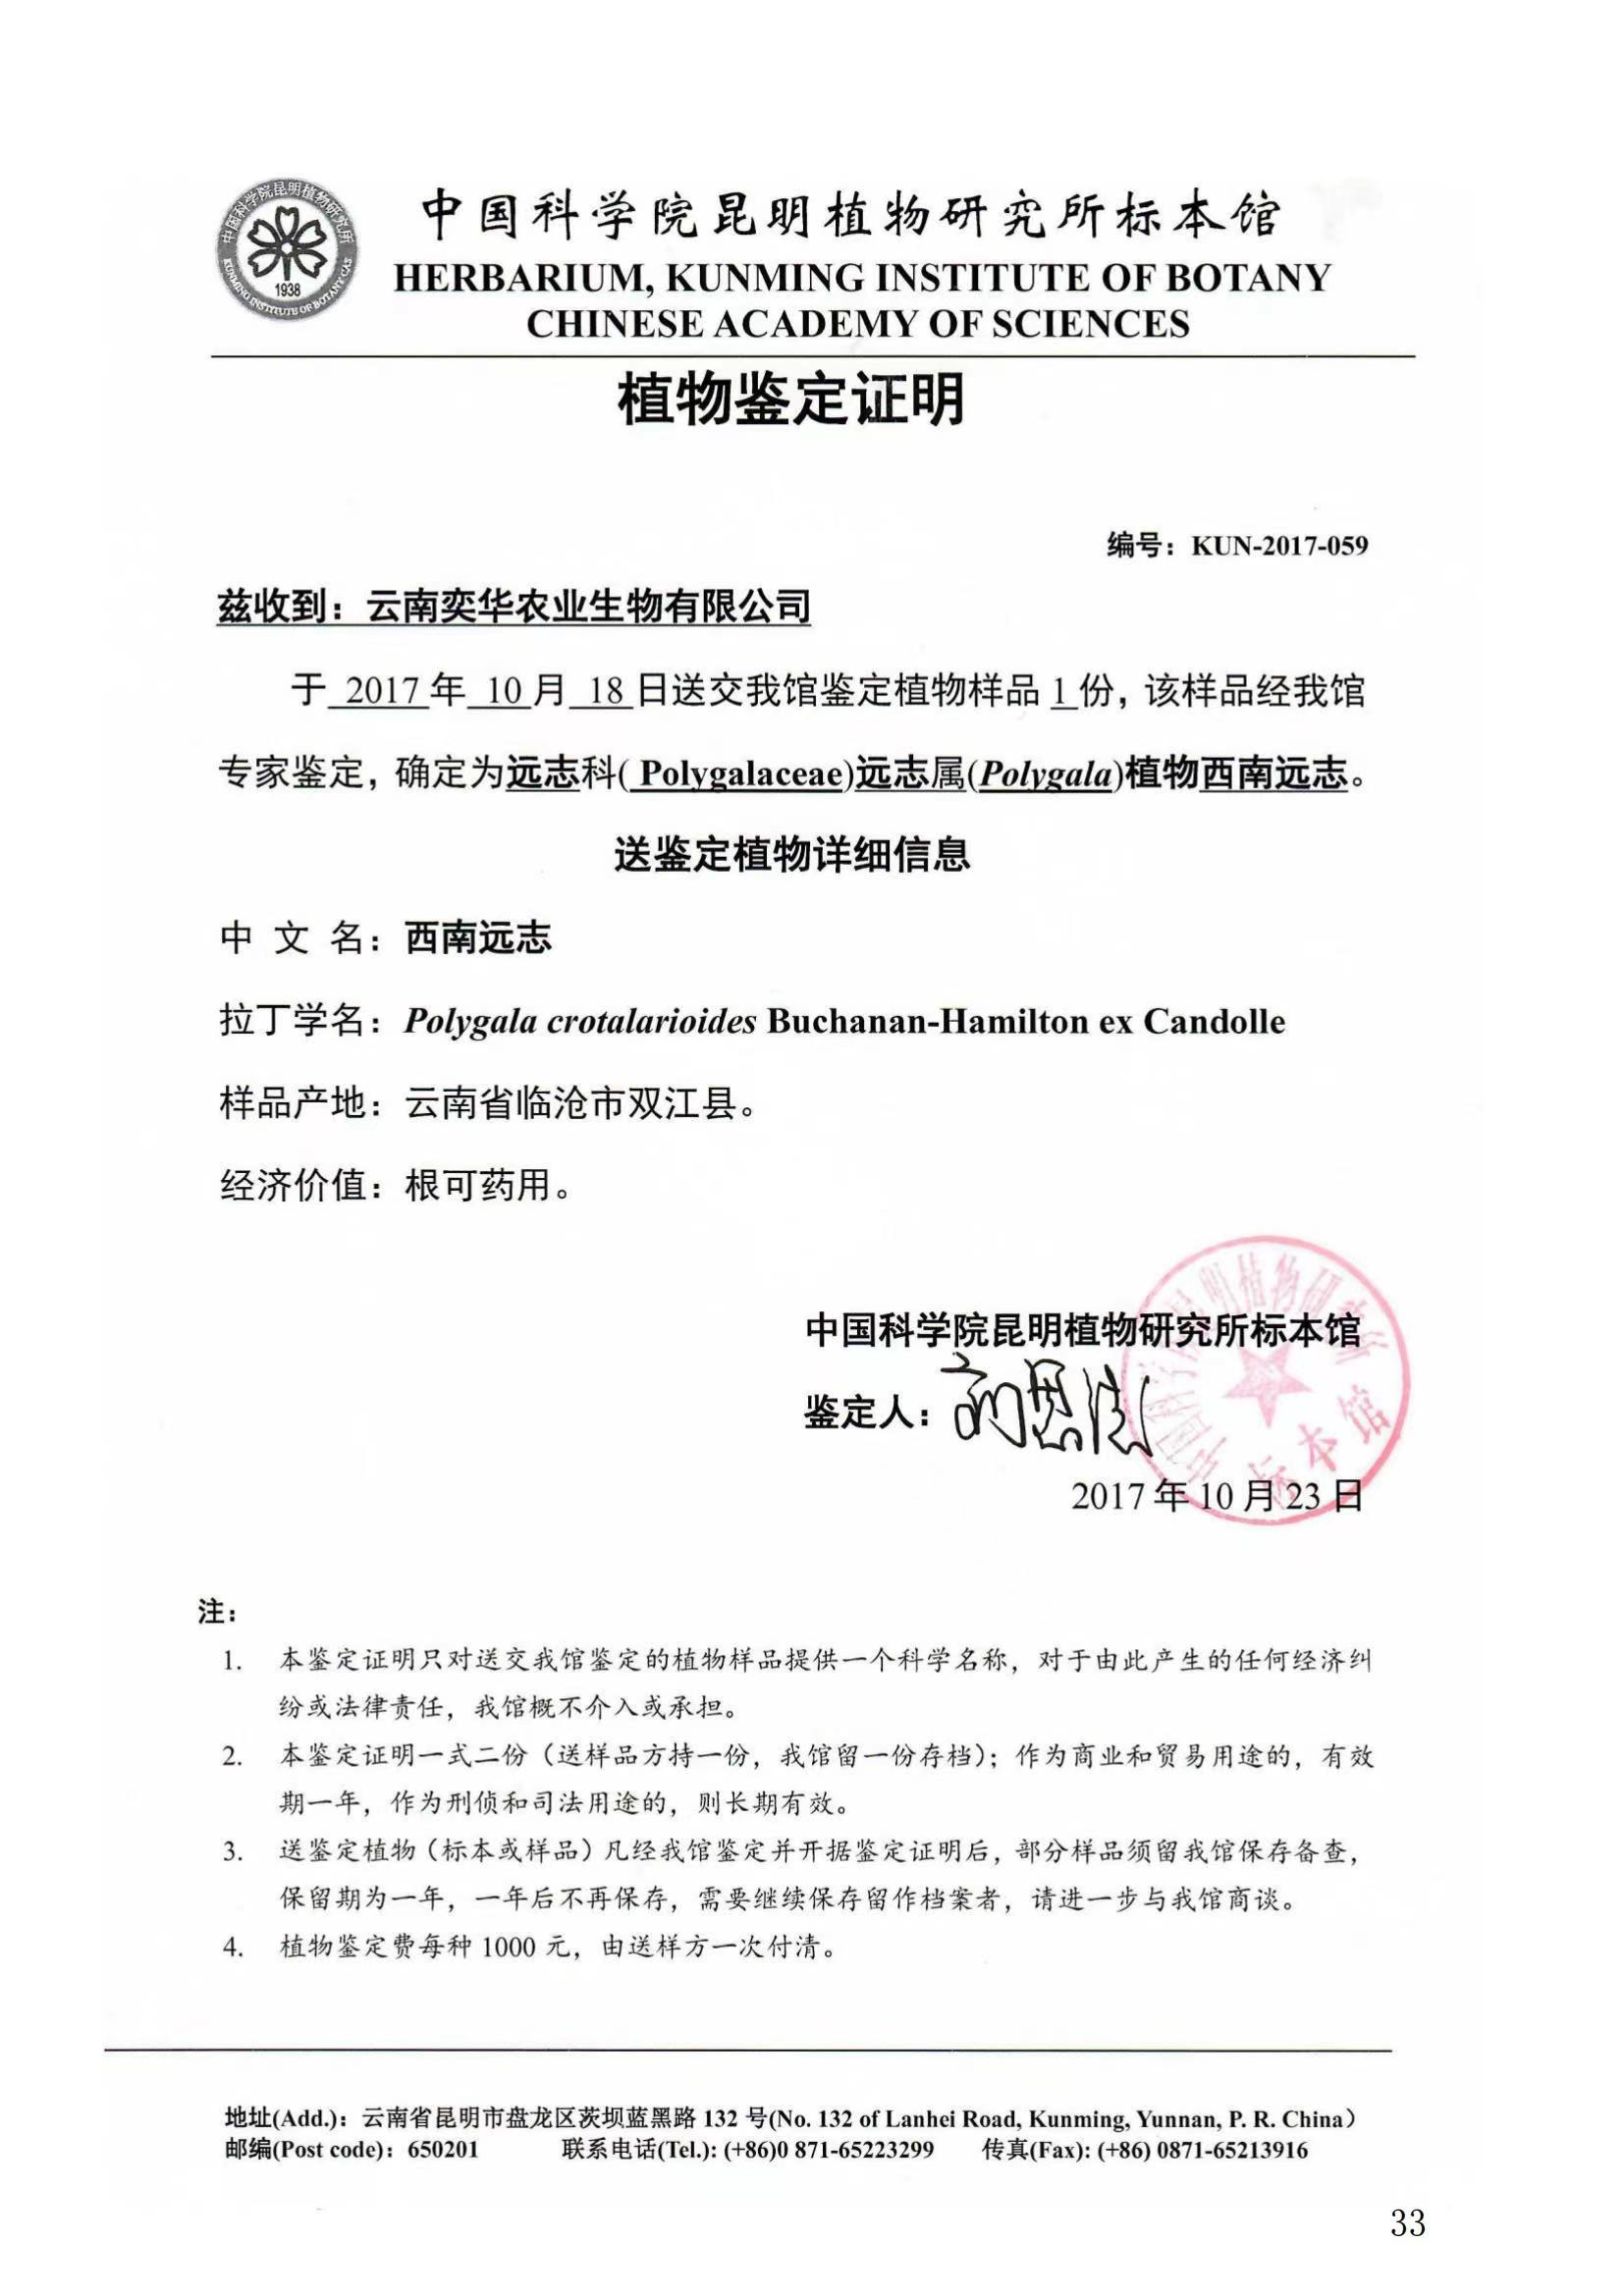


**Fig. 3S** Rarefaction curve of detected endophytic bacteria genes in leaf, root, and stem of *Polygala sibirica* Linnaeus and *Polygala crotalarioides* Buchanan-Hamilton ex Candolle. All curves reached a plateau, indicating that the amount of sequencing data gradually tended to be reasonable


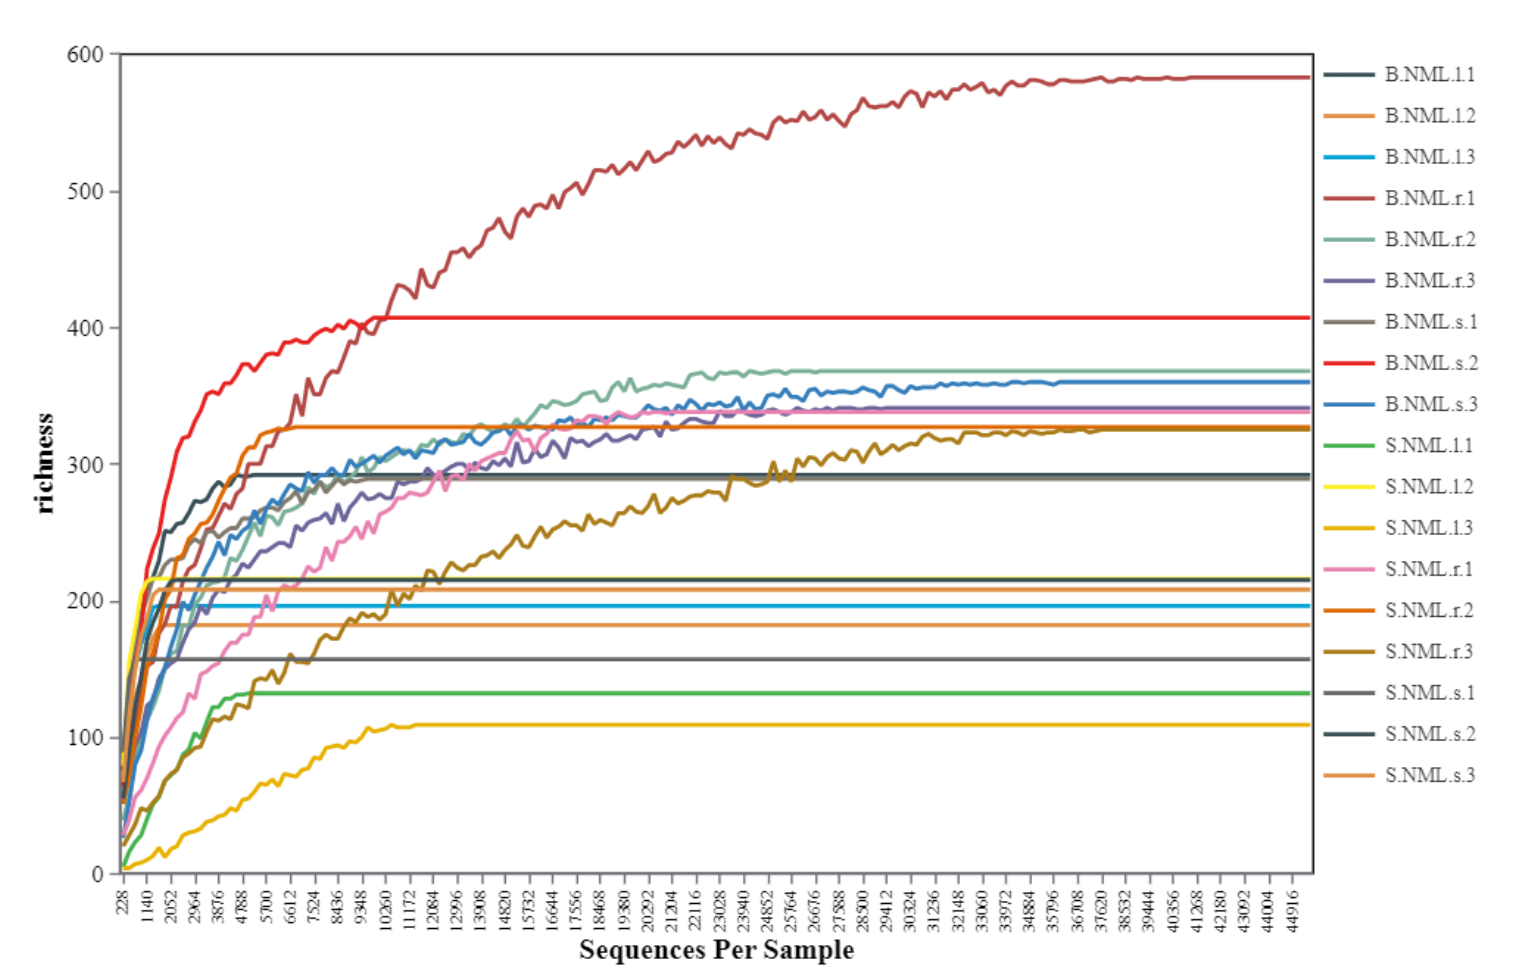


**Fig. 4S** Significant difference taxa of leaf (a, A3), root(b, A1), and stem(c, A2) samples of *P. sibirica* Linnaeus by Kruskal-Wallis analysis. [LDA score (log10) = 4]. Statistical signiﬁcance was deﬁned by p < 0.05.


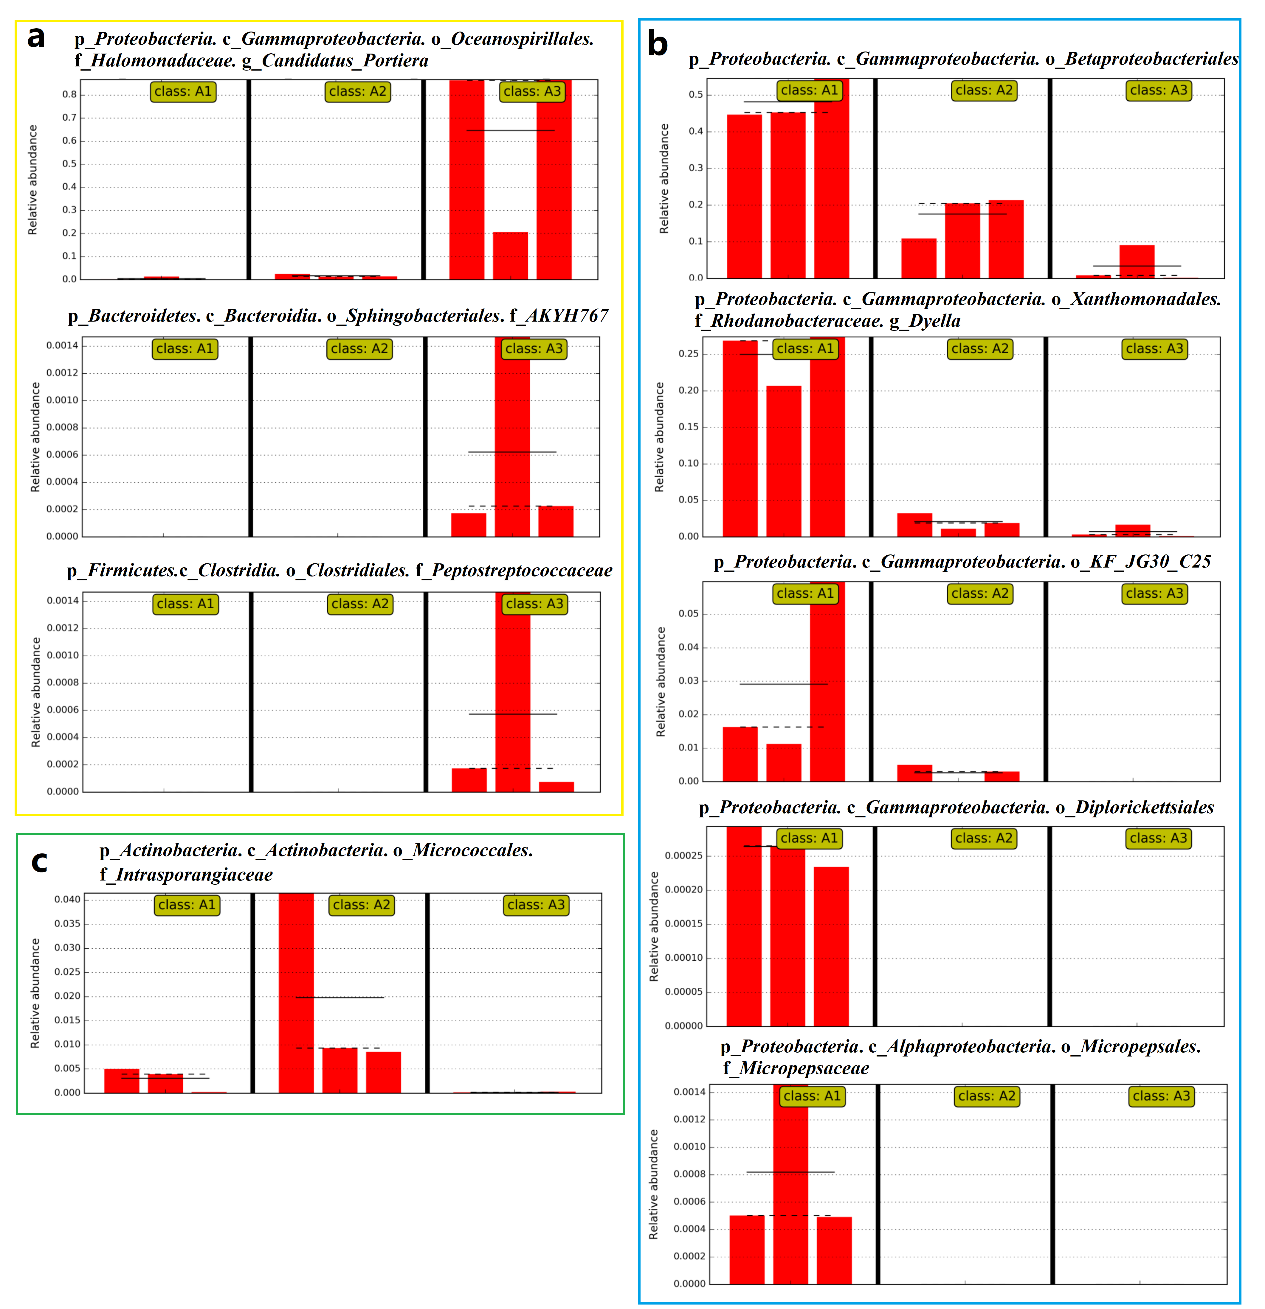


**Fig. 5S**  Significant difference taxa of leaf (a, A3), root(b, A1), and stem(c, A2) samples of *P. crotalarioides* Buchanan-Hamilton ex Candolle by Kruskal-Wallis analysis. [LDA score (log10) = 4]. Statistical signiﬁcance was deﬁned by p < 0.05.


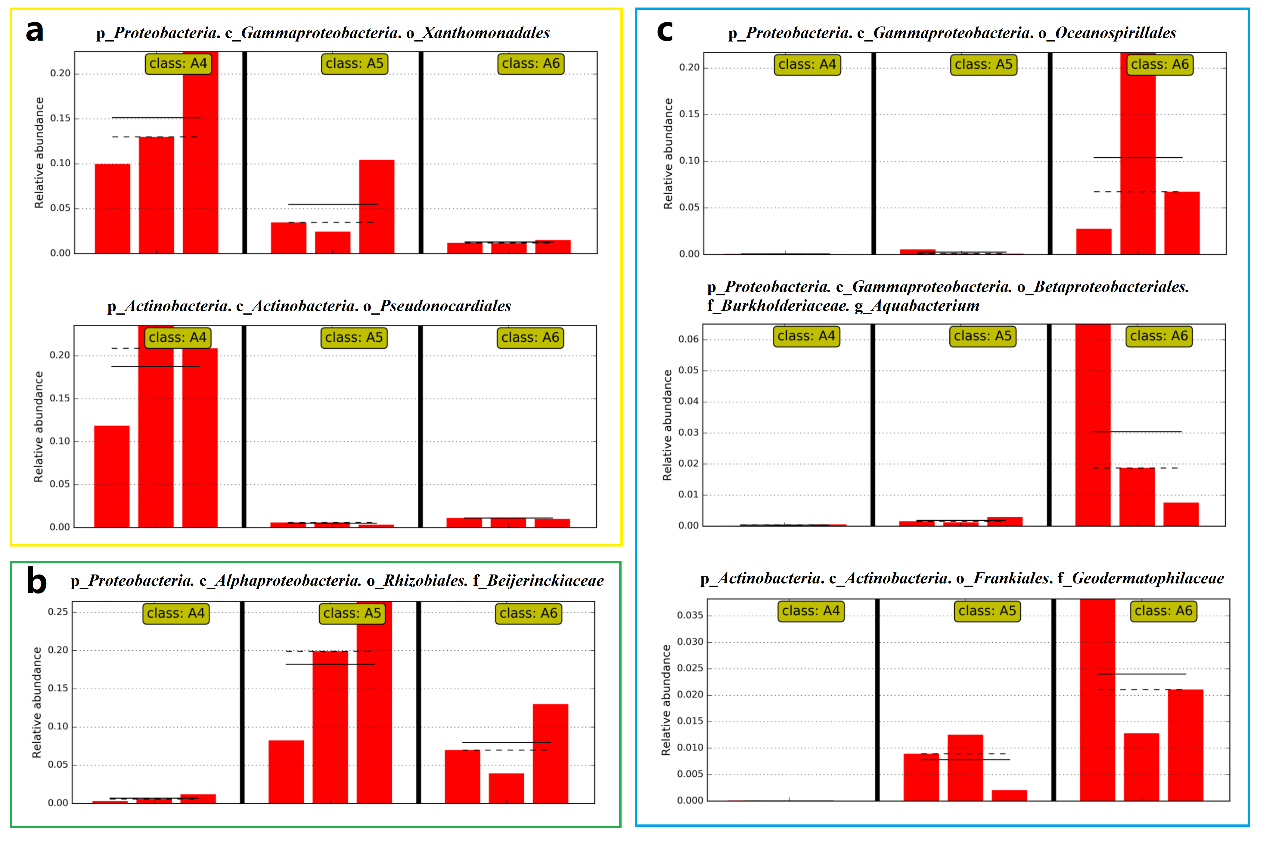


**Fig. 6S** KEGG pathway variance analysis using PICRUSt. (a) pathways of endophytic bacteria in roots (A1), stems (A2) and leaves (A3) of *P. sibirica Linnaeus*. (b) pathways of endophytic bacteria in roots (A1), stems (A2) and leaves (A3) of *P. crotalarioides Buchanan-Hamilton ex Candolle*. The pathways with relative abundance≥ 1% were selected for analysis of variance.


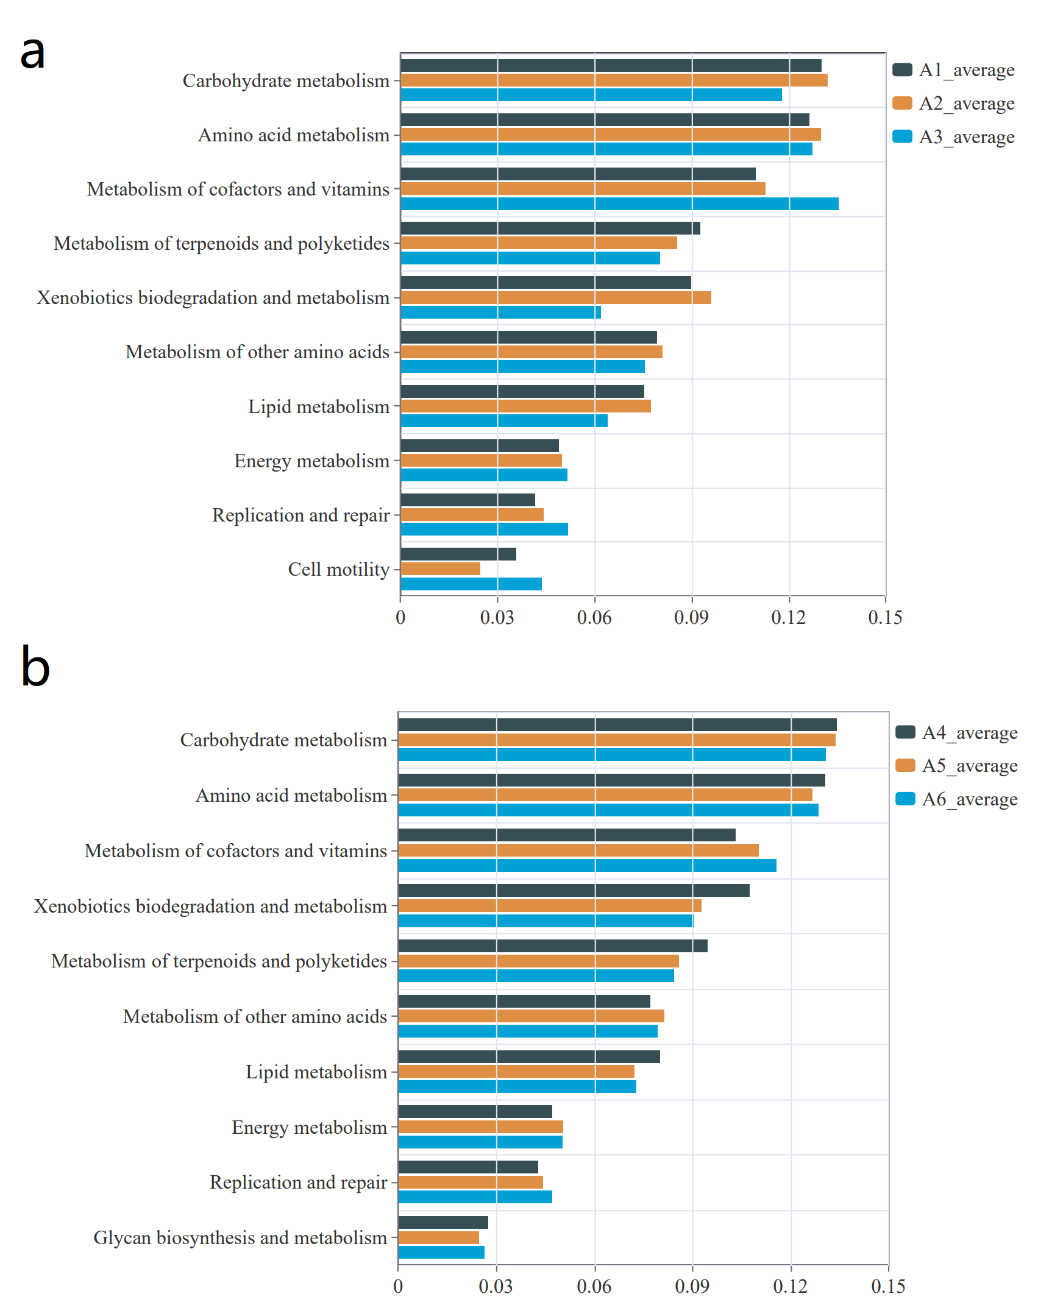

Supplement: Supplementary file 1 [file 6fb435da6697c08c51d2683c.docx]
